# Supplementary material for: Robust and flexible composite aerogel films with porous multilayered structures toward broadband electromagnetic wave absorption
Source: Royal Society of Chemistry journal article supplement (doi:10.1039/d4tc00207e), 2024-01-01
Supplement: d4tc00207e1.pdf [file d4tc00207e1.pdf]

1 **Supporting Information**

2 **Robust and flexible composite aerogel films with porous multilayered structures**  
3 **toward broadband electromagnetic wave absorption**

4 Zhihui Li<sup>a,b</sup>, Chenhui Xu<sup>a</sup>, Jiajia Zheng<sup>a</sup>, Tianyi Hang<sup>a</sup>, Yiming Chen<sup>a,\*</sup>, Hongjun Lin<sup>c</sup>, Xiping Li<sup>a</sup>,

5 Zhiyi Wu<sup>b,\*</sup>

6 <sup>a</sup> *Key Laboratory of Urban Rail Transit Intelligent Operation and Maintenance Technology &*  
7 *Equipment of Zhejiang Province, College of Engineering, Zhejiang Normal University, Jinhua*  
8 *321004, China.*

9 <sup>b</sup> *Beijing Institute of Nanoenergy and Nanosystems, Chinese Academy of Sciences, Beijing 100083,*  
10 *China.*

11 <sup>c</sup> *College of Geography and Environmental Sciences, Zhejiang Normal University, Jinhua 321004,*  
12 *China.*

13 *\*Emails: yiming.chen@zjnu.edu.cn (Y. Chen); wuzhiyi@binn.cas.cn (Z. Wu)*

14

15

16

## Supporting Information Corresponding Formulas

### 17 S1. Electromagnetic parameters measurement

18 The electromagnetic parameters including complex permittivity and complex permeability of the  
 19 composite aerogel films were measured within the frequency range of 2-18 GHz. The  $RL-f$  curve is  
 20 calculated using the measured electromagnetic parameters based on the following equations:

$$21 \quad R(d) = 20 \log \left| \frac{Z_{in} - Z_0}{Z_{in} + Z_0} \right| \quad (\text{Eq. S1})$$

$$22 \quad \frac{Z_{in}}{Z_0} = \sqrt{\frac{\mu_r}{\epsilon_r}} \tanh \left[ j \frac{2\pi}{c} d \sqrt{\mu_r \epsilon_r} \right] \quad (\text{Eq. S2})$$

23 where  $Z_{in}$  represents the input impedance of the absorber,  $Z_0$  is the impedance of free space,  $\epsilon_r$  is the  
 24 relative complex permittivity,  $\mu_r$  is the relative complex permeability,  $f$  is the frequency,  $d$  is the sample  
 25 thickness, and  $c$  is the speed of light.

### 26 S2. Debye relaxation

27 Dielectric polarization refers to the phenomenon where bound charges migrate along the direction  
 28 of an applied electric field, resulting in electron displacement or alignment of dipoles. In high-  
 29 frequency electromagnetic fields, when the motion of electrons or the reorientation of dipoles cannot  
 30 keep up with the changes under the alternating electric field, a lagging effect of electron or dipole  
 31 polarization relaxation occurs. The Cole-Cole semicircle equation based on the Debye relaxation  
 32 theory can effectively contribute to understanding the relaxation processes that occur under the  
 33 influence of alternating electromagnetic fields based on the following equations:

$$34 \quad \epsilon = \epsilon_\infty + \frac{\epsilon_s - \epsilon_\infty}{1 + \omega^2 \tau^2} \quad (\text{Eq. S3})$$

35 
$$\epsilon'' = \frac{\epsilon_s - \epsilon_\infty}{1 + \omega^2 \tau^2} \omega \tau + \frac{\sigma}{\omega \epsilon_0} \quad (\text{Eq. S4})$$

36 where  $\epsilon_\infty$  represents the relative dielectric constant at high-frequency limit,  $\epsilon_s$  denotes the static  
 37 dielectric constant,  $\omega$  refers to the angular frequency,  $\tau$  is the polarization relaxation time, and  $\sigma$  is the  
 38 conductivity. From Eq. S3 and Eq. S4, we can obtain the relationship between  $\epsilon'$  and  $\epsilon''$ :<sup>2</sup>

39 
$$\left(\epsilon' - \frac{\epsilon_s + \epsilon_\infty}{2}\right)^2 + \left(\epsilon'' - \frac{\epsilon_s - \epsilon_\infty}{2}\right)^2 = \left(\frac{\epsilon_s - \epsilon_\infty}{2}\right)^2 \quad (\text{Eq. S5})$$

40 It should be noted that each Cole-Cole semicircle corresponds to a Debye relaxation  
 41 process.

42 **S3. Quarter-wavelength resonance formula**

43 
$$f_m = \frac{(2N - 1)c}{4t_m n} \quad (\text{Eq. S6})$$

44 where  $f_m$  is the resonance peak frequency and  $t_m$  is the resonance thickness of the sample. While  $n$  is  
 45 the real part of square root of the product of complex permittivity and permeability, and  $N$  is a positive  
 46 integer.

47 **S4. Impedance matching**

48 The attenuation constant ( $\alpha$ ), which mainly determines the attenuation capability of  
 49 the incident EMWs, can be expressed based on the following equation:

50 
$$\alpha = \frac{\sqrt{2}}{c} \pi \sqrt{(\epsilon'' - \mu''^2) + \sqrt{(\epsilon'' - \epsilon\mu'{}^2 + \mu''^2) + \epsilon\mu'{}^2 \mu''^2}} \quad (\text{Eq. S7})$$

51 To achieve high-performance EMW absorption, it is quite important that the incident  
 52 EMWs should enter the absorber as much as possible. Therefore, a good impedance  
 53 matching at the air-material interface is extremely necessary and critical. According to  
 54 Eq. S1 and Eq. S2, the best impedance matching can be obtained when the  $Z$  ( $|Z_{in}/Z_0|$ )  
 55 value is close or equal to 1 ( $Z_{in} = Z_0$ ), and the  $RL$  will reach its optimal value.<sup>3</sup>

56

### Supporting Information Corresponding Figures and Table

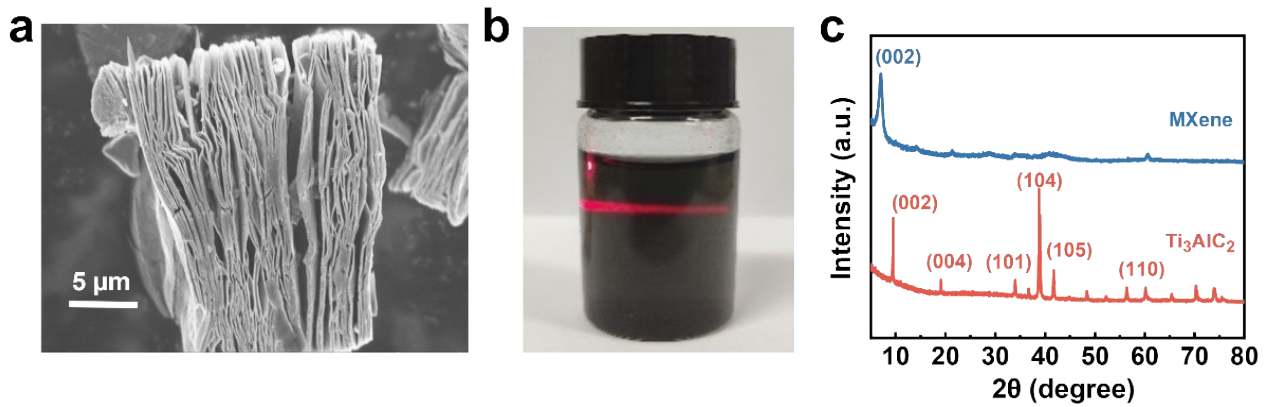

57

58 **Fig. S1.** (a) SEM image of the multilayered  $\text{Ti}_3\text{C}_2\text{T}_x$ . (b) Digital imaging of the Tyndall effect produced

59 by  $\text{Ti}_3\text{C}_2\text{T}_x$  suspensions. (c) XRD patterns of MAX phase and  $\text{Ti}_3\text{C}_2\text{T}_x$ .

60

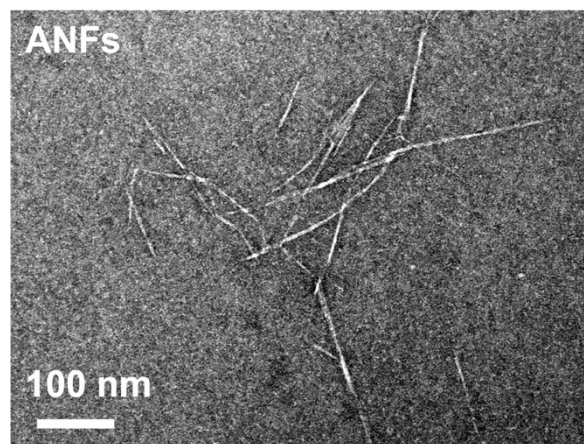

61

62 **Fig. S2.** TEM image of ANFs.

63

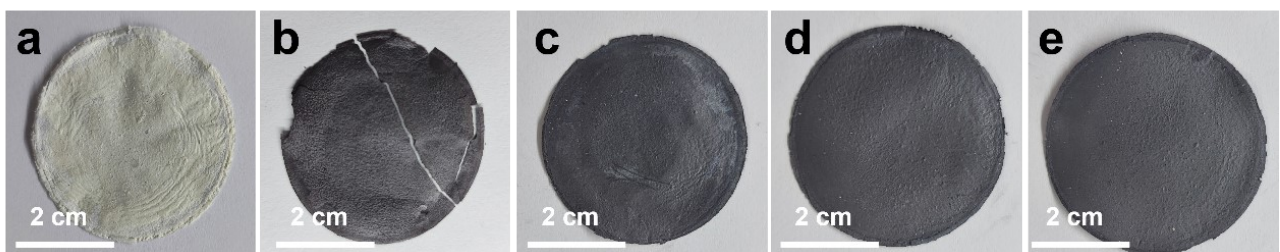

64

65 **Fig. S3.** Digital images of the (a) pure ANF film, (b) pure MXene film, (c) AM, (d) AMN-1, and (e)

66 AMN-3.

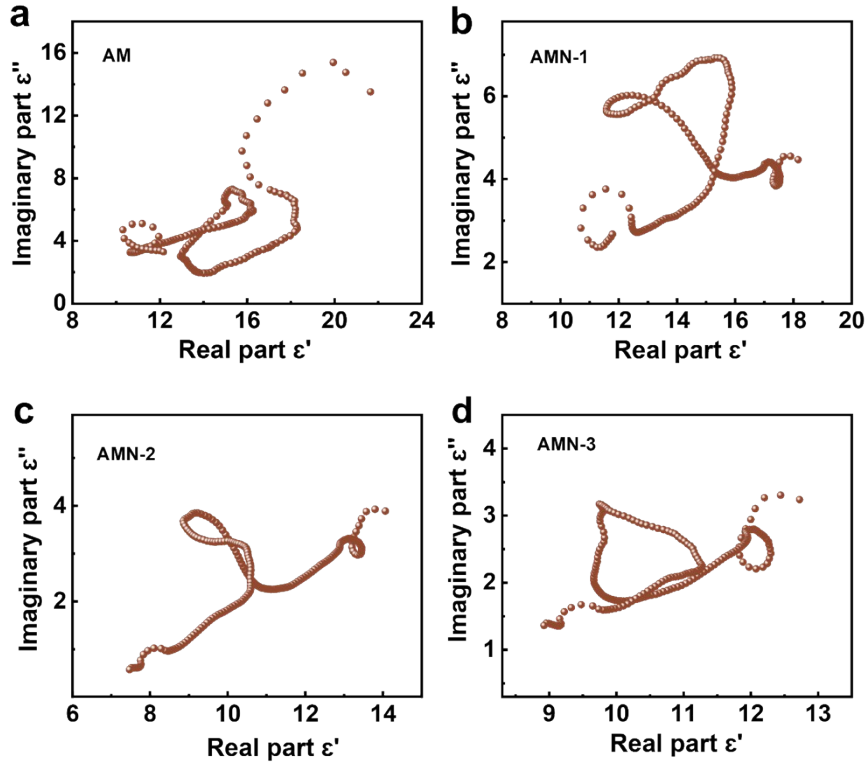

67  
 68 **Fig. S4.** Cole-Cole curves of (a) AM, (b) AMN-1, (c) AMN-2, and (d) AMN-3.

69

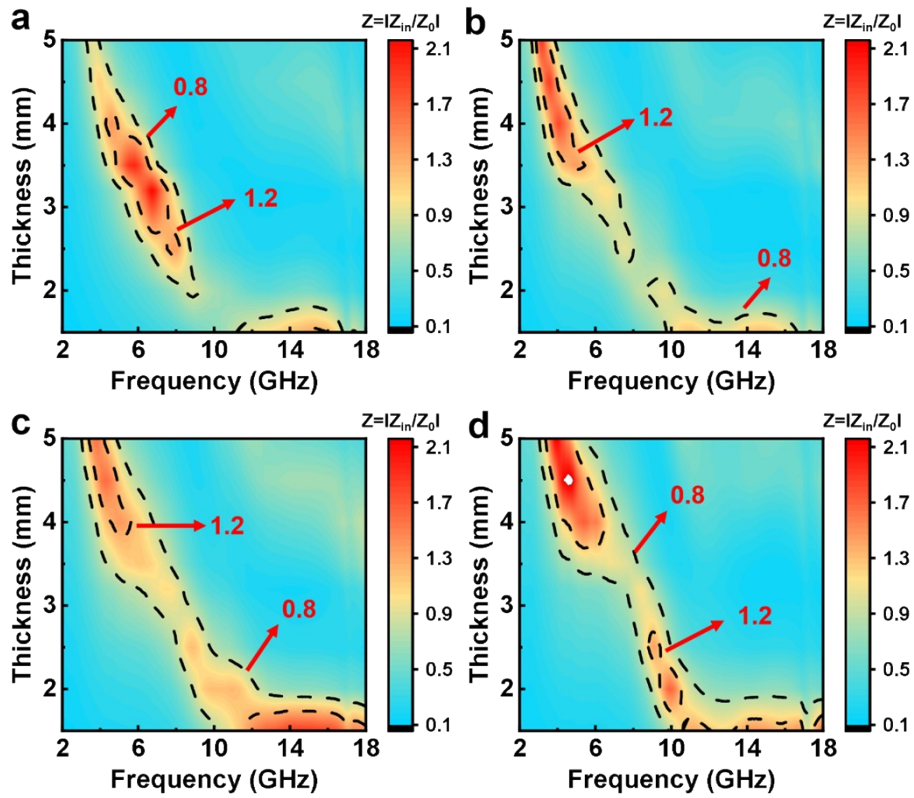

70  
 71 **Fig. S5.** The values of  $Z = |Z_{in}/Z_0|$  of (a) AM, (b) AMN-1, (c) AMN-2, and (d) AMN-3.

72 **Table S1.** Comparison of EMW absorption properties of the AMN aerogel film with other related  
 73 MXene-based composites.

| Samples                                                                       | <i>RL</i> (dB) | <i>EAB</i> (GHz) | Matching thickness<br>(mm) | Ref.      |
|-------------------------------------------------------------------------------|----------------|------------------|----------------------------|-----------|
| Fe <sub>3</sub> O <sub>4</sub> @Ti <sub>3</sub> C <sub>2</sub> T <sub>x</sub> | -57.2          | 1.4              | 4.2                        | 4         |
| MXene/Ni                                                                      | -49.9          | 2.1              | 1.75                       | 5         |
| MXene/Ni                                                                      | -31.9          | 2.3              | 1.0                        | 6         |
| MXene-CoC                                                                     | -46.48         | 3.0              | 1.02                       | 7         |
| Ti <sub>3</sub> C <sub>2</sub> T <sub>x</sub> /Fe <sub>3</sub> O <sub>4</sub> | -50.18         | 3.2              | 1.3                        | 8         |
| Ni@MXene                                                                      | -52.6          | 3.7              | 3.0                        | 9         |
| MXene-CNTs/Ni                                                                 | -56.4          | 3.95             | 2.4                        | 10        |
| Co/ZnO@CNTs/Ti <sub>3</sub> C <sub>2</sub> T <sub>x</sub>                     | -46.0          | 4.0              | 1.9                        | 11        |
| MXene/RGO                                                                     | -44.3          | 4.84             | 1.5                        | 12        |
| MXene-rGO/CoNi                                                                | -54.1          | 4.9              | 2.01                       | 13        |
| MXene/Ni                                                                      | -50.5          | 5.28             | 3.5                        | 14        |
| MXene/RGO                                                                     | -31.2          | 5.4              | 2.05                       | 15        |
| ANF/MXene/Ni                                                                  | -48.6          | 5.8              | 1.5                        | This work |

## 75 References

- 76 1. C. Wang, V. Murugadoss, J. Kong, Z. He, X. Mai, Q. Shao, Y. Chen, L. Guo, C. Liu, S. Angaiah and  
77 Z. Guo, *Carbon*, 2018, **140**, 696-733.
- 78 2. N. Yang, Z.-X. Luo, G.-R. Zhu, S.-C. Chen, X.-L. Wang, G. Wu and Y.-Z. Wang, *ACS Appl.*  
79 *Mater. Interfaces*, 2019, **11**, 35987-35998.
- 80 3. M. Green and X. Chen, *J. Materiomics*, 2019, **5**, 503-541.
- 81 4. X. Zhang, H. Wang, R. Hu, C. Huang, W. Zhong, L. Pan, Y. Feng, T. Qiu, C. Zhang and J. Yang,  
82 *Appl. Surf. Sci.*, 2019, **484**, 383-391.
- 83 5. L. Liang, G. Han, Y. Li, B. Zhao, B. Zhou, Y. Feng, J. Ma, Y. Wang, R. Zhang and C. Liu, *ACS*  
84 *Appl. Mater. Interfaces*, 2019, **11**, 25399-25409.
- 85 6. F. Pan, Y. Rao, D. Batalu, L. Cai, Y. Dong, X. Zhu, Y. Shi, Z. Shi, Y. Liu and W. Lu, *Nanomicro*  
86 *lett.*, 2022, **14**, 140.
- 87 7. F. Pan, L. Yu, Z. Xiang, Z. Liu, B. Deng, E. Cui, Z. Shi, X. Li and W. Lu, *Carbon*, 2021, **172**,  
88 506-515.
- 89 8. Y. Li, Y. Gao, B. Fan, L. Guan, B. Zhao and R. Zhang, *J. Phys. Chem. C*, 2021, **125**, 19914-  
90 19924.
- 91 9. L. Liang, R. Yang, G. Han, Y. Feng, B. Zhao, R. Zhang, Y. Wang and C. Liu, *ACS Appl. Mater.*  
92 *Interfaces*, 2020, **12**, 2644-2654.
- 93 10. X. Li, W. You, C. Xu, L. Wang, L. Yang, Y. Li and R. Che, *Nanomicro lett.*, 2021, **13**, 157.
- 94 11. C. Sun, Q. Li, Z. Jia, G. Wu and P. Yin, *Chem. Eng. J.*, 2023, **454**, 140277.
- 95 12. X. Li, D. Xu, D. Zhou, S. Pang, C. Du, M. A. Darwish, T. Zhou and S.-K. Sun, *Carbon*, 2023,  
96 **208**, 374-383.

- 97 13. X. Li, Z. Wu, W. You, L. Yang and R. Che, *Nanomicro lett.*, 2022, **14**, 73.
- 98 14. X. Li, W. You, L. Wang, J. Liu, Z. Wu, K. Pei, Y. Li and R. Che, *ACS Appl. Mater. Interfaces*,
- 99 2019, **11**, 44536-44544.
- 100 15. L. Wang, H. Liu, X. Lv, G. Cui and G. Gu, *J. Alloys Compd.*, 2020, **828**, 154251.

101
